# Supplementary material for: Assessment on the Environmental Concern Level and Driving Mechanism of Beach Recreationists Based on the New Ecological Paradigm Scale
Source: MDPI journal article supplement (doi:10.3390/su16083292), 2024-04-15
Supplement: s1 [file s1]

[illegible][illegible]

---

**Supplementary Table S3. Load matrix of environmental behavior influence factor**

| Factor | 1     | 2     | 3     |
|--------|-------|-------|-------|
| N16    | .849  | -.071 | -.004 |
| N17    | .879  | .031  | .003  |
| N18    | .836  | .058  | .083  |
| N19    | .906  | .073  | -.012 |
| N20    | .084  | .735  | -.494 |
| N21    | -.119 | .570  | .232  |
| N22    | .392  | -.429 | .225  |
| N23    | -.226 | .571  | .541  |
| N24    | .915  | .150  | -.019 |
| N25    | -.175 | .667  | .473  |
| N26    | .035  | .807  | .083  |
| N27    | .914  | .039  | -.040 |
| N28    | .791  | -.108 | -.002 |
| N29    | .049  | .755  | -.456 |
| N30    | .894  | .045  | .008  |
| N31    | .907  | .120  | .025  |
| N32    | .634  | -.081 | .285  |
| N33    | .901  | .098  | -.008 |

---
